# Supplementary material for: PrimerMapper: high throughput primer design and graphical assembly for PCR and SNP detection
Source: PubMed Central journal article supplement (PMC4745053; doi:10.1038/srep20631), 2016-02-08
Supplement: srep20631-s2.pdf [file srep20631-s2.pdf]

## **SUPPLEMENTARY DATA**

**Manuscript Title:** PrimerMapper: high throughput primer design and graphical assembly for PCR and SNP detection

**Author:** Damien M. O'Halloran

**Supplementary Table S1.** List of software and websites referenced

**Supplementary Video S1.** User-guide to installing and running PrimerMapper.

**Supplementary Table S1.** List of software and websites referenced

| <b>Program or site</b>   | <b>Webpage</b>                                                                                                                                    |
|--------------------------|---------------------------------------------------------------------------------------------------------------------------------------------------|
| <i>dbSNP</i>             | <a href="http://www.ncbi.nlm.nih.gov/projects/SNP/">http://www.ncbi.nlm.nih.gov/projects/SNP/</a>                                                 |
| <i>ActivePerl</i>        | <a href="http://www.activestate.com/activeperl">http://www.activestate.com/activeperl</a>                                                         |
| <i>BioSeqIO</i>          | <a href="http://search.cpan.org/dist/BioPerl/Bio/SeqIO.pm">http://search.cpan.org/dist/BioPerl/Bio/SeqIO.pm</a>                                   |
| <i>BioGraphics</i>       | <a href="http://search.cpan.org/~lds/Bio-Graphics-2.39/lib/Bio/Graphics.pm">http://search.cpan.org/~lds/Bio-Graphics-2.39/lib/Bio/Graphics.pm</a> |
| <i>BioSeqFeature</i>     | <a href="http://search.cpan.org/dist/BioPerl/Bio/SeqFeature/Generic.pm">http://search.cpan.org/dist/BioPerl/Bio/SeqFeature/Generic.pm</a>         |
| <i>CPAN</i>              | <a href="http://www.cpan.org/">http://www.cpan.org/</a>                                                                                           |
| <i>GenBank</i>           | <a href="http://www.ncbi.nlm.nih.gov/genbank/">http://www.ncbi.nlm.nih.gov/genbank/</a>                                                           |
| <i>e-utilities</i>       | <a href="http://www.ncbi.nlm.nih.gov/books/NBK25500/">http://www.ncbi.nlm.nih.gov/books/NBK25500/</a>                                             |
| <i>jQuery</i>            | <a href="https://jquery.com/">https://jquery.com/</a>                                                                                             |
| <i>Fabric.js</i>         | <a href="http://fabricjs.com/">http://fabricjs.com/</a>                                                                                           |
| <i>NEB Tm calculator</i> | <a href="http://tmcalculator.neb.com/#/">http://tmcalculator.neb.com/#/</a>                                                                       |

**Supplementary Video S1.** User-guide to installing and running PrimerMapper.
